# Supplementary material
Source: Springer Nature journal article supplement (https://www.springermedizin.de/resource/supplementary/12985_2011_1371_MOESM6_ESM.pdf/9609660)

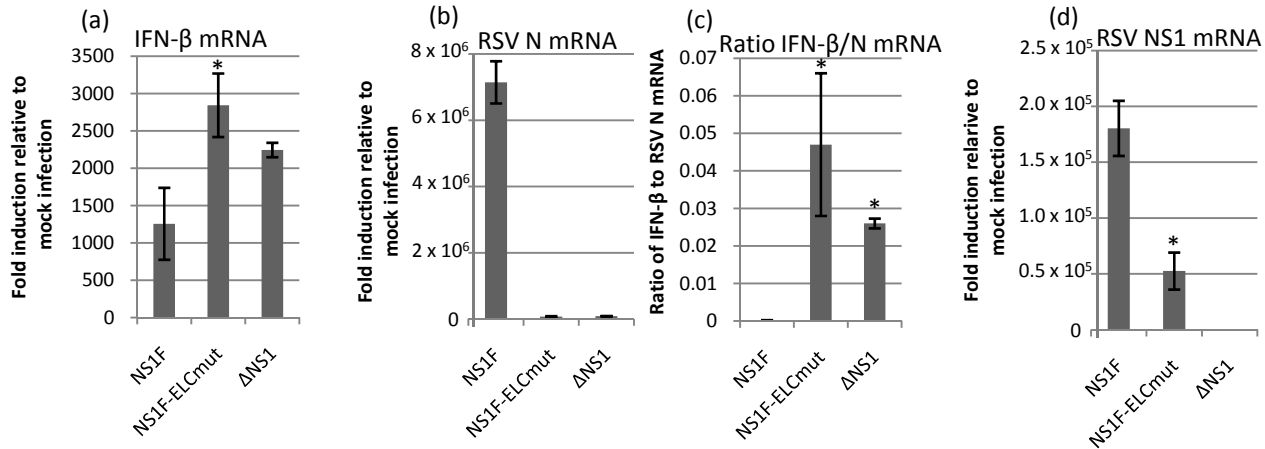

Supplement: MOESM6 [file 9609660]
